# Supplementary material
Source: PubMed Central journal article supplement (PMC1177373)

**a**

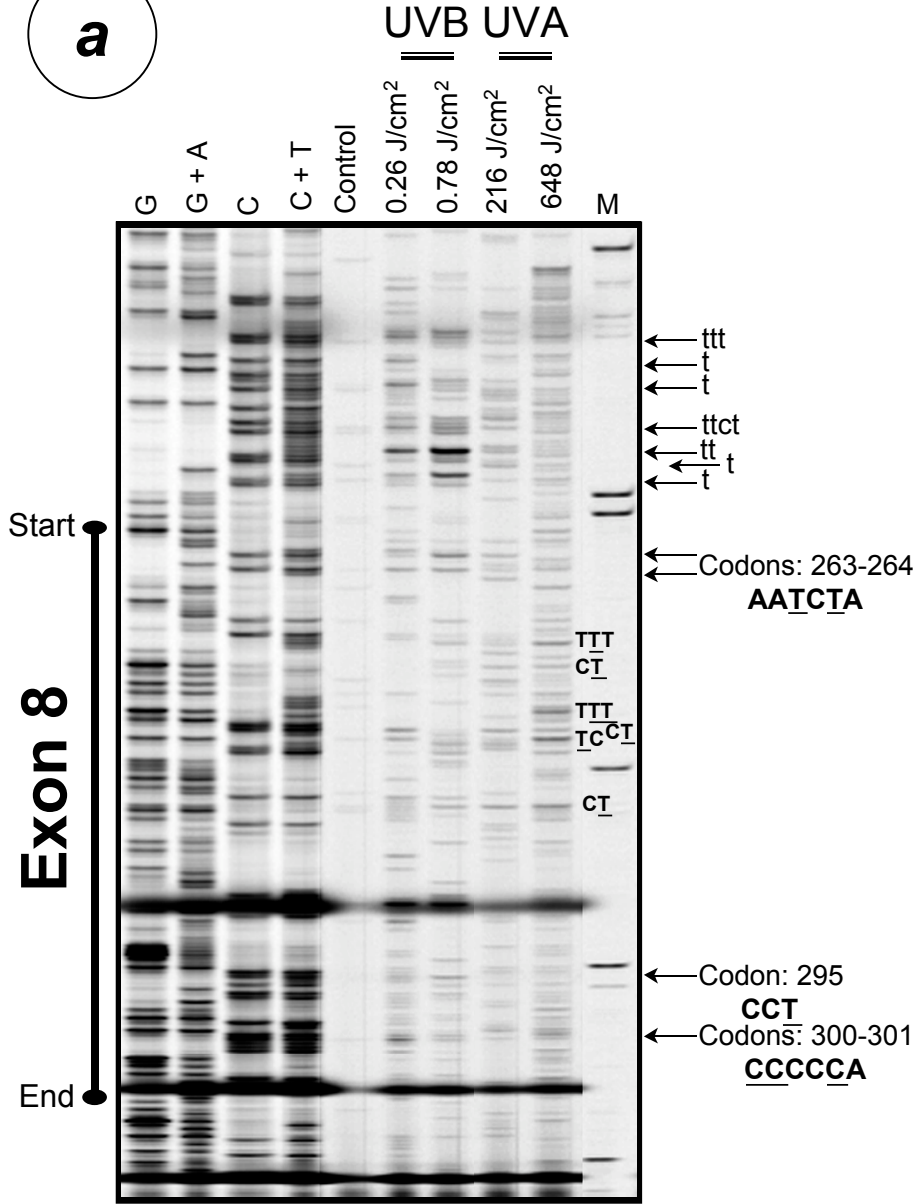

**b**

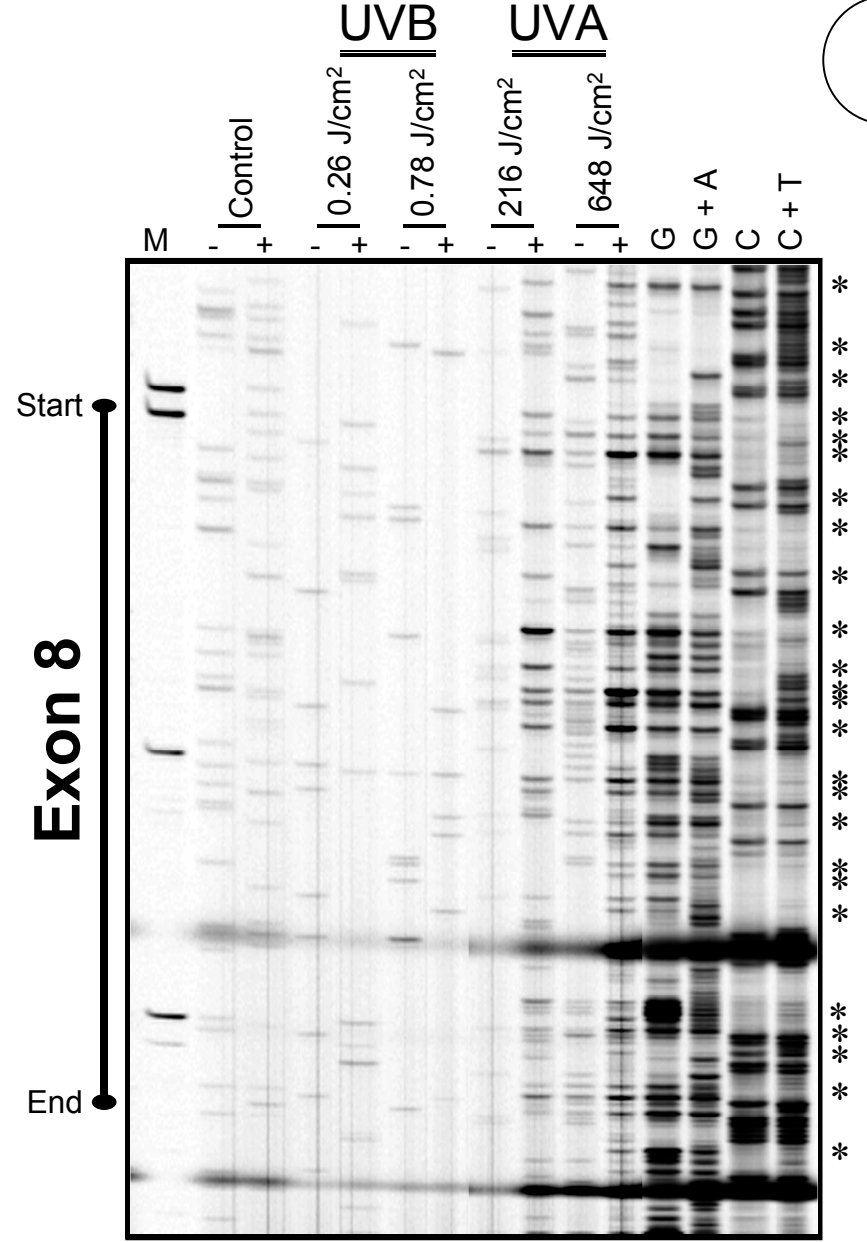

Supplement: pnas_0502311102_2.pdf [file pnas_0502311102_2.pdf]

**a**

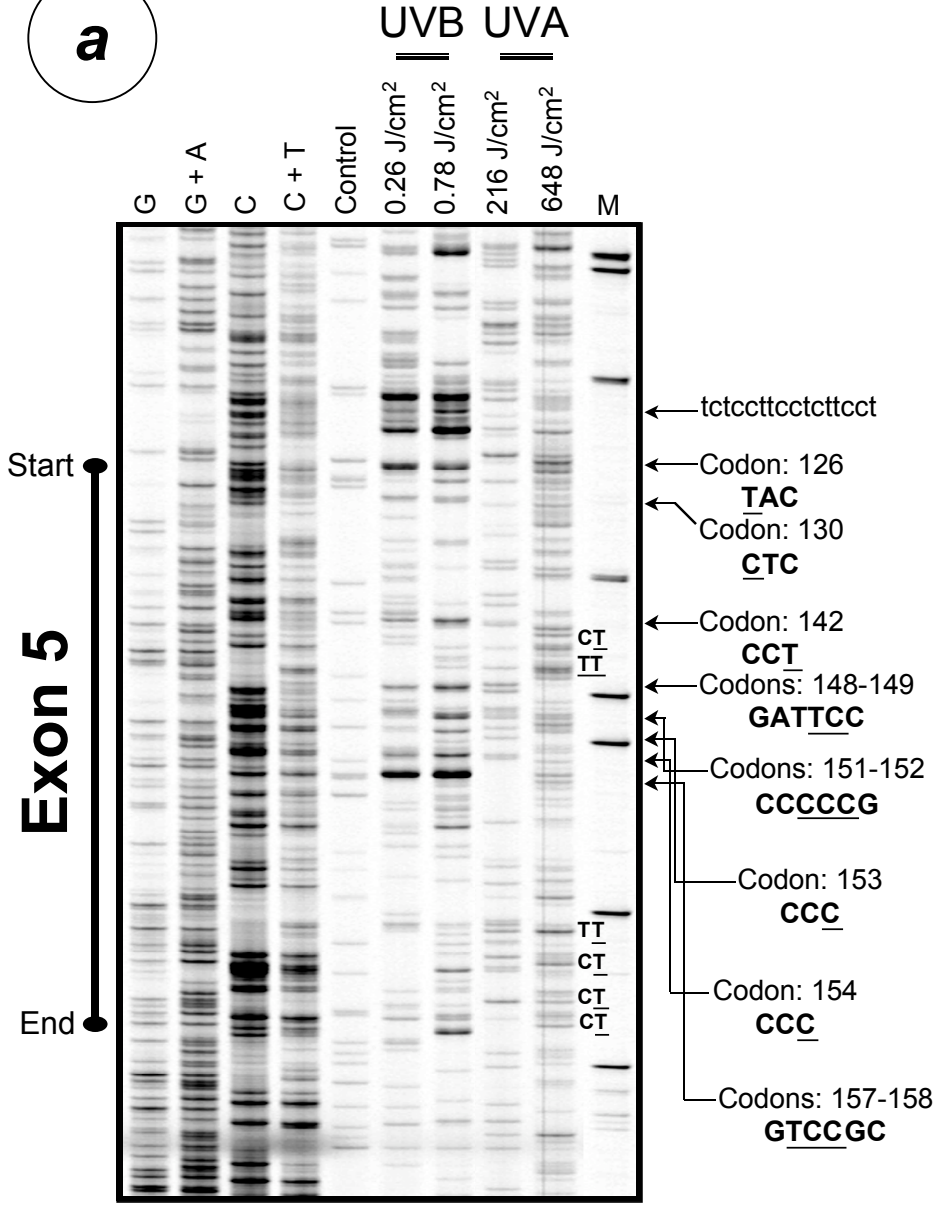

**b**

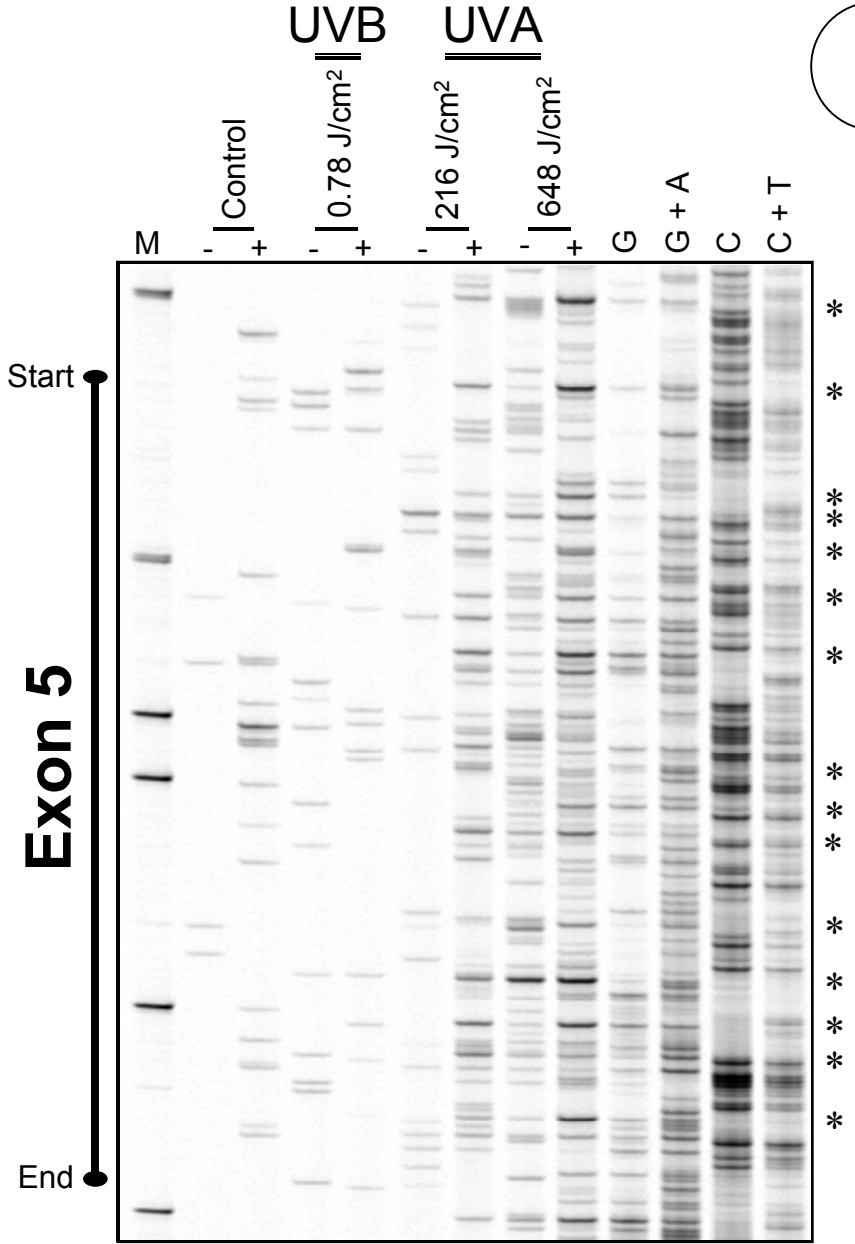

Supplement: pnas_0502311102_3.pdf [file pnas_0502311102_3.pdf]
